# Supplementary material for: Facile and effective synthesis of hierarchical TiO2 spheres for efficient dye-sensitized solar cells
Source: Royal Society of Chemistry journal article supplement (doi:10.1039/c3nr01604h), 2013-01-01
Supplement: c3nr01604h.pdf [file c3nr01604h.pdf]

Supporting Information

## Facile Synthesis of Hierarchical TiO<sub>2</sub> Spheres for Efficient Dye-Sensitized Solar Cells

Meidan Ye, Chang Chen, Miaoqiang Lv, Dajiang Zheng, Wenxi Guo, Changjian Lin\*

State Key Laboratory of Physical Chemistry of Solid Surfaces, and Department of Chemistry,  
College of Chemistry and Chemical Engineering, Xiamen University, Xiamen 361005,  
China

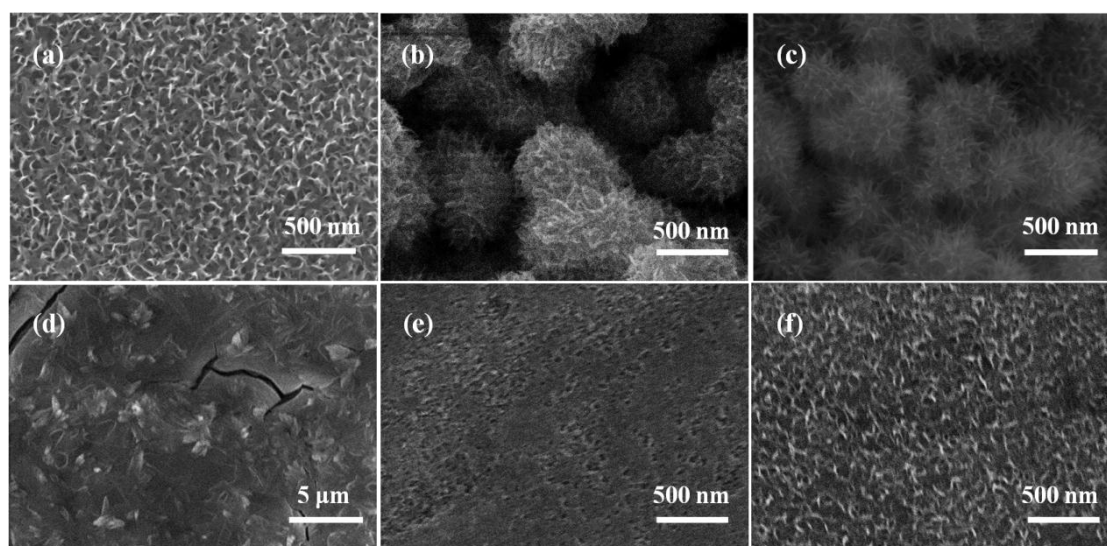

Figure S1. SEM images of TiO<sub>2</sub> products prepared in different conditions. (a) Surface structure on Ti foil prepared by hydrothermal processing in aqueous solution containing 15 mL H<sub>2</sub>O<sub>2</sub> (30 wt%), 15 mL DI water and 0.3 M NaOH, with Ti foils as Ti source at 80 °C for 1 h. (b, c) spheres collected from Ti foil prepared by hydrothermal processing in aqueous solution containing 15 mL H<sub>2</sub>O<sub>2</sub> (30 wt%), 15 mL DI water and 0.3 M NaOH, with Ti foils as Ti source for 1 h at (b) 60 °C and (c) 100 °C. (d, e, f) Surface structure on Ti foil prepared by hydrothermal processing in aqueous solution containing (d) 1.5 mL H<sub>2</sub>O<sub>2</sub> (30 wt%), 28.5 mL DI water and 3 M NaOH, with Ti foils as Ti source at 80 °C for 1 h, (e) 15 mL H<sub>2</sub>O<sub>2</sub> (30 wt%), 15 mL DI water, with Ti foils as Ti source at 80 °C for 1 h, and (f) 30 mL DI water and 0.3 M NaOH, with Ti foils as Ti source at 80 °C for 1 h.

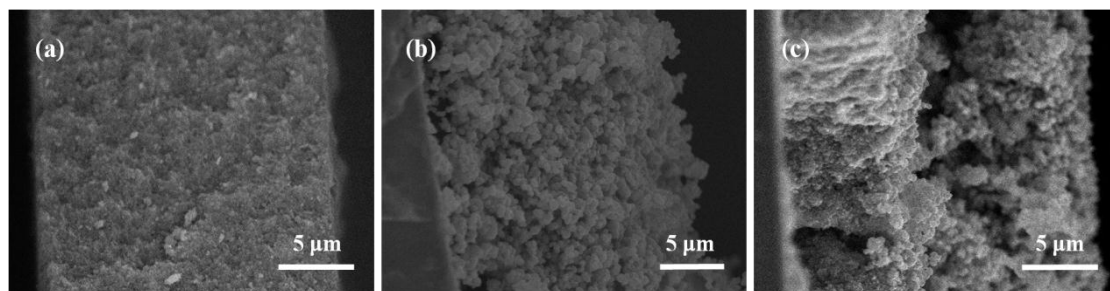

Figure S2. SEM images of the three films (a) P25 nanoparticle film, (b) sphere film, and (c) bi-layered film (P25 nanoparticles + spheres).
